# Supplementary material
Source: PubMed Central journal article supplement (PMC5628127)

# Supplemental Figure 3

**A.**

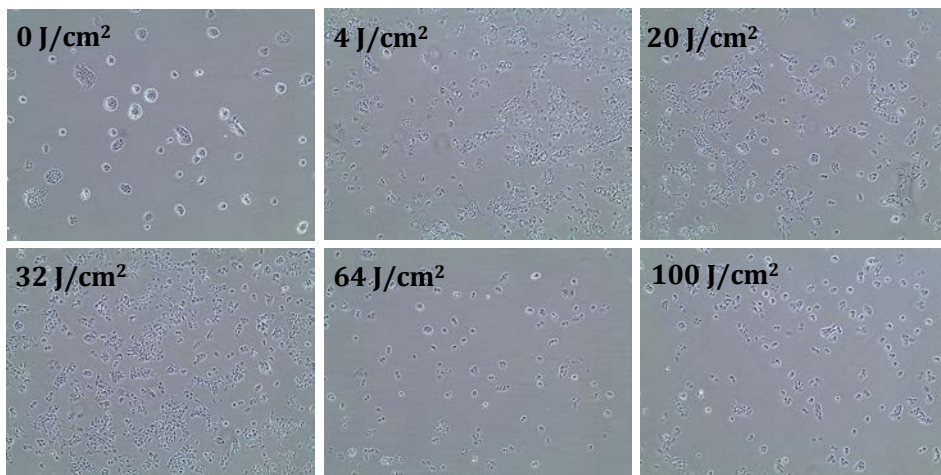

**B.**

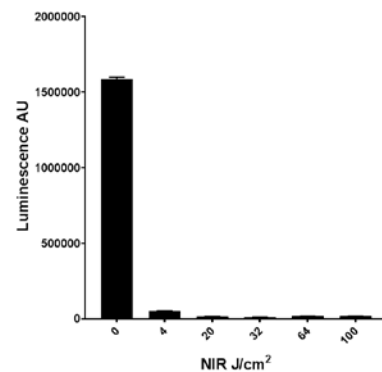

**C.**

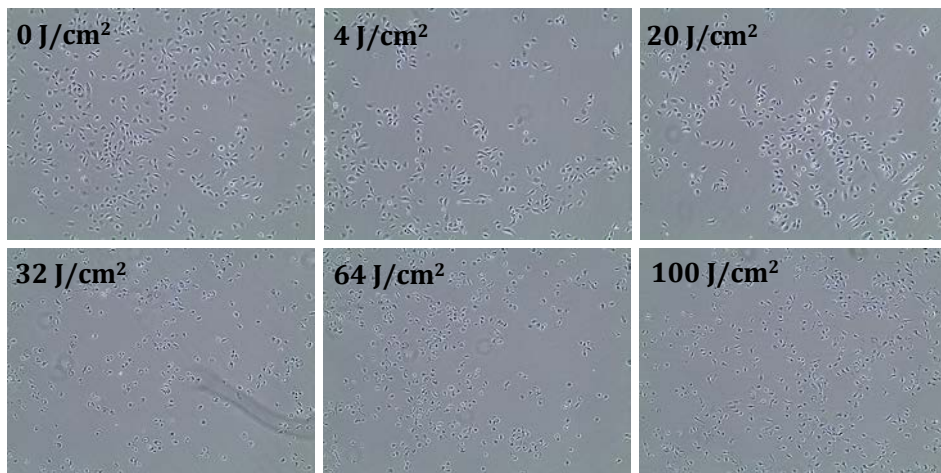

**D.**

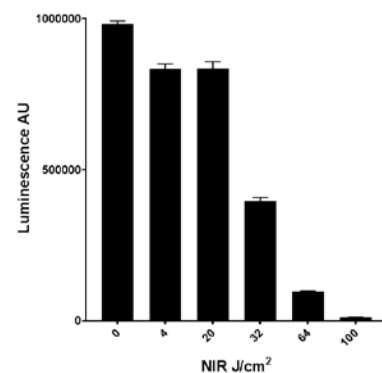

**E.**

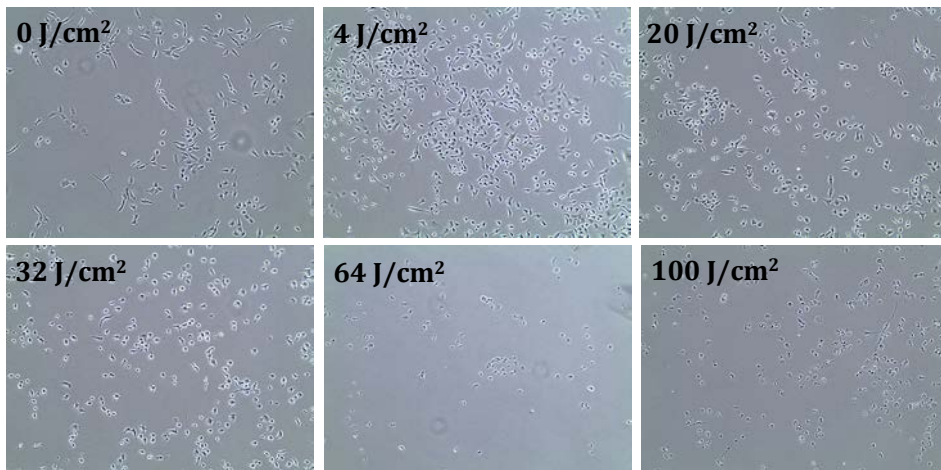

**F.**

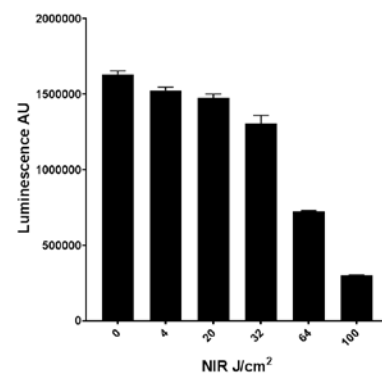

Supplement: NIHMS885958-supplement-3.pdf [file NIHMS885958-supplement-3.pdf]
